# Supplementary material for: Long-term can-sealing protection: a stable black phosphorus nanoassembly achieved through heterogeneous hydrophobic functionalization
Source: Royal Society of Chemistry journal article supplement (doi:10.1039/d0nr08364j), 2020-12-10
Supplement: d0nr08364j1.pdf [file d0nr08364j1.pdf]

## Electronic Supplementary Information (ESI)

Long-Term Can-Sealing Protection: Stable Black Phosphorus Nanoassembly Achieved through  
Heterogeneous Hydrophobic Functionalization

Ying-Hao Pai, and Chun-Hua Chen\*

*Department of Materials Science and Engineering, National Chiao Tung University, 1001 Ta-  
Hsueh Rd., Hsin-Chu, 30010 Taiwan, Republic of China.*

\*Corresponding Author: [ChunHuaChen@mail.nctu.edu.tw](mailto:ChunHuaChen@mail.nctu.edu.tw) (CH Chen)

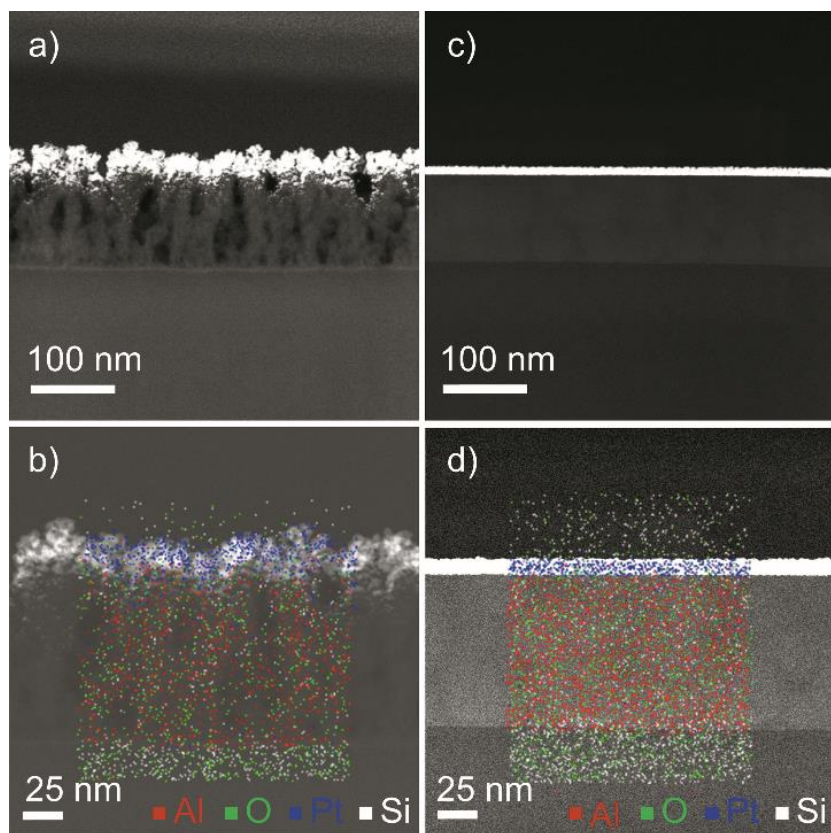

**Figure S1.** (a-d) Cross-sectional HAADF images and corresponding EDS mappings of Al (red), O (green), Pt (blue), and Si (white) taken from Column-LP and Dense-HT.

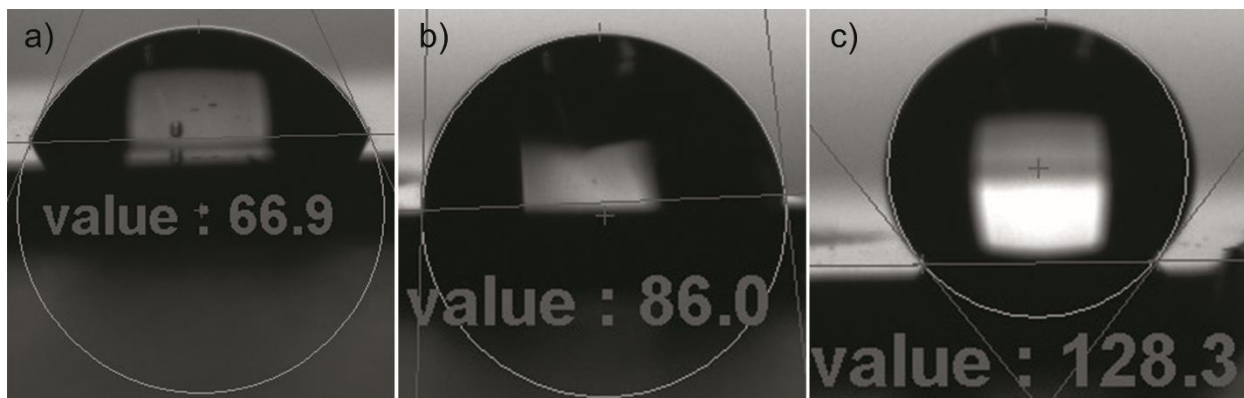

**Figure S2.** Contact angle images for droplets of water on (a) SiO<sub>2</sub>/Si substrate, (b) hydrophilic dense Al<sub>2</sub>O<sub>3</sub>, and (c) hydrophobic columnar Al<sub>2</sub>O<sub>3</sub> layer.

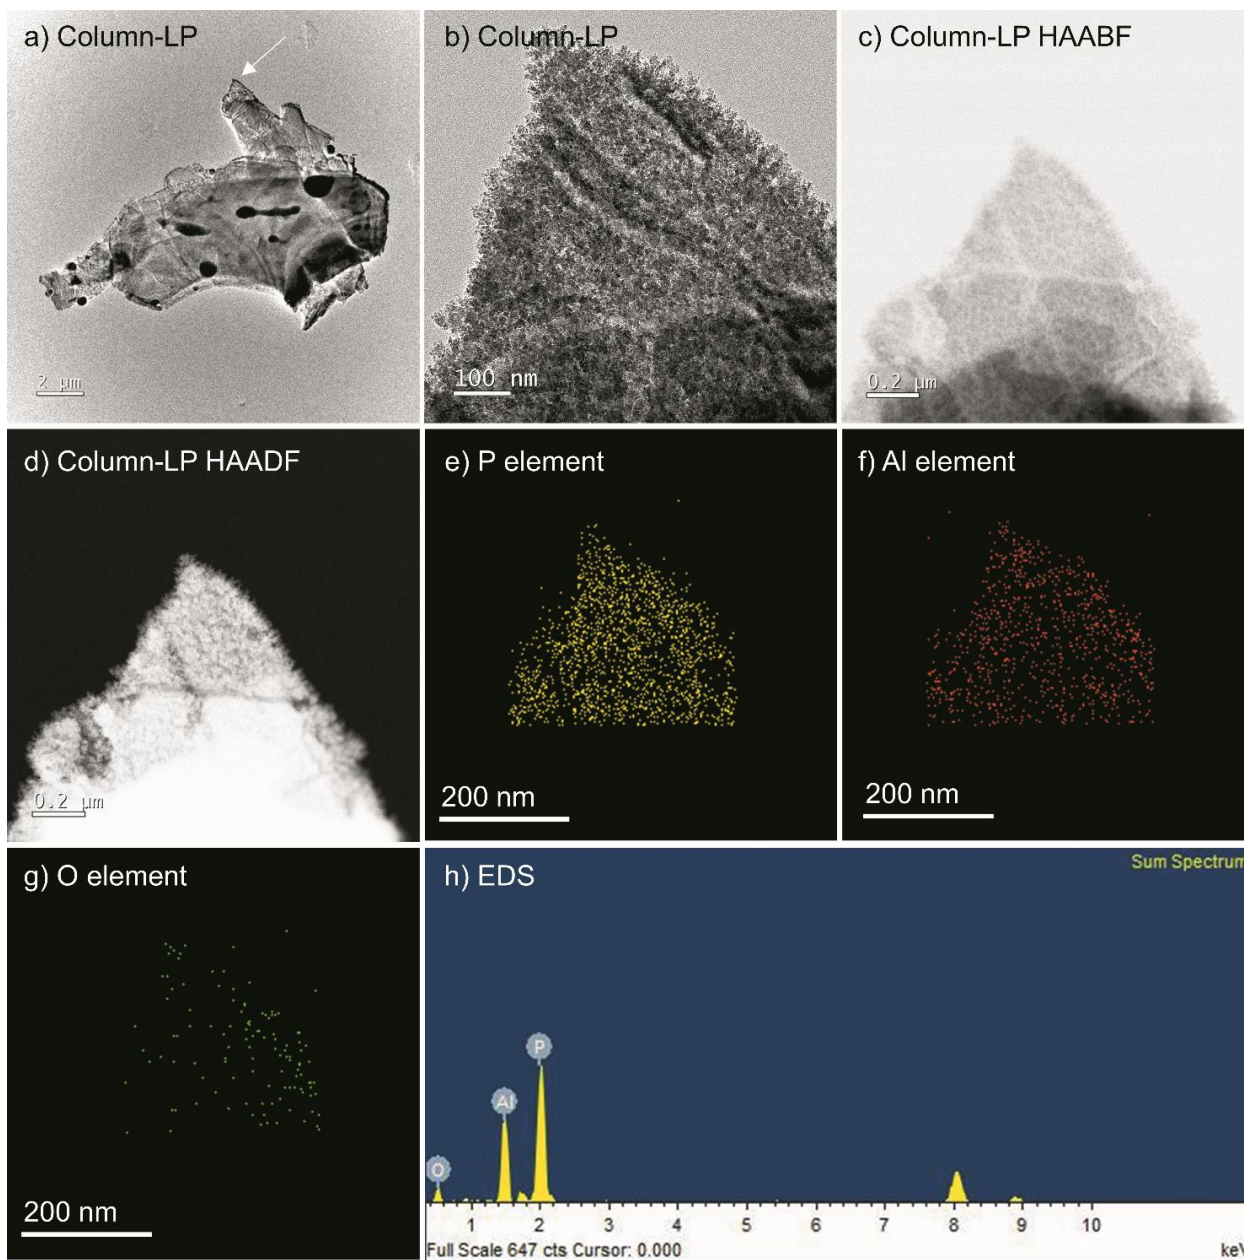

**Figure S3.** TEM images of (a) an isolated BP flake capped with hydrophobic  $\text{Al}_2\text{O}_3$  layer and (b) enlarged image from (a). (c) HAABF and (d) HAADF STEM images, the corresponding (e-g) EDS-STEM mappings of P, Al, and O elements, and (h) EDS spectrum of (d).

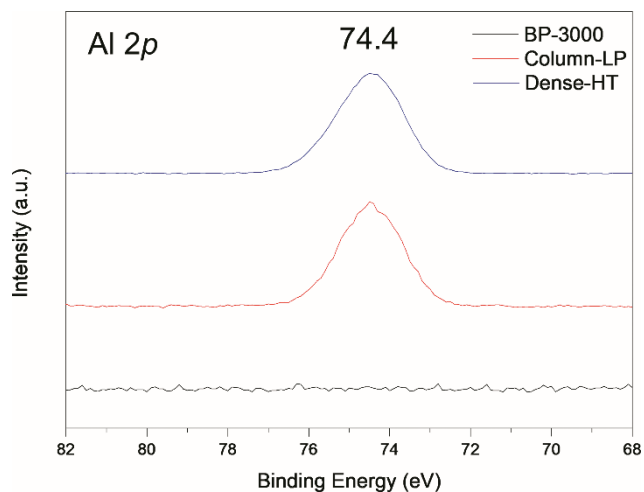

**Figure S4.** XPS binding energy around Al 2*p* core-levels recorded from the pristine BP flakes collected with a centrifugal speed of 3K rpm (BP-3000) and the Al<sub>2</sub>O<sub>3</sub> capped BP flakes assemblies (Dense-HT and Column-LP).

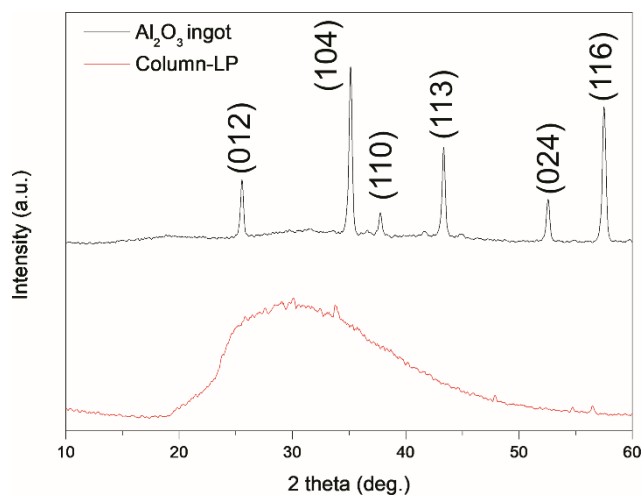

**Figure S5.** The XRD patterns were recorded from the Al<sub>2</sub>O<sub>3</sub> ingot for laser ablation and the obtained Al<sub>2</sub>O<sub>3</sub> layer deposited at a substrate temperature of 25 °C.



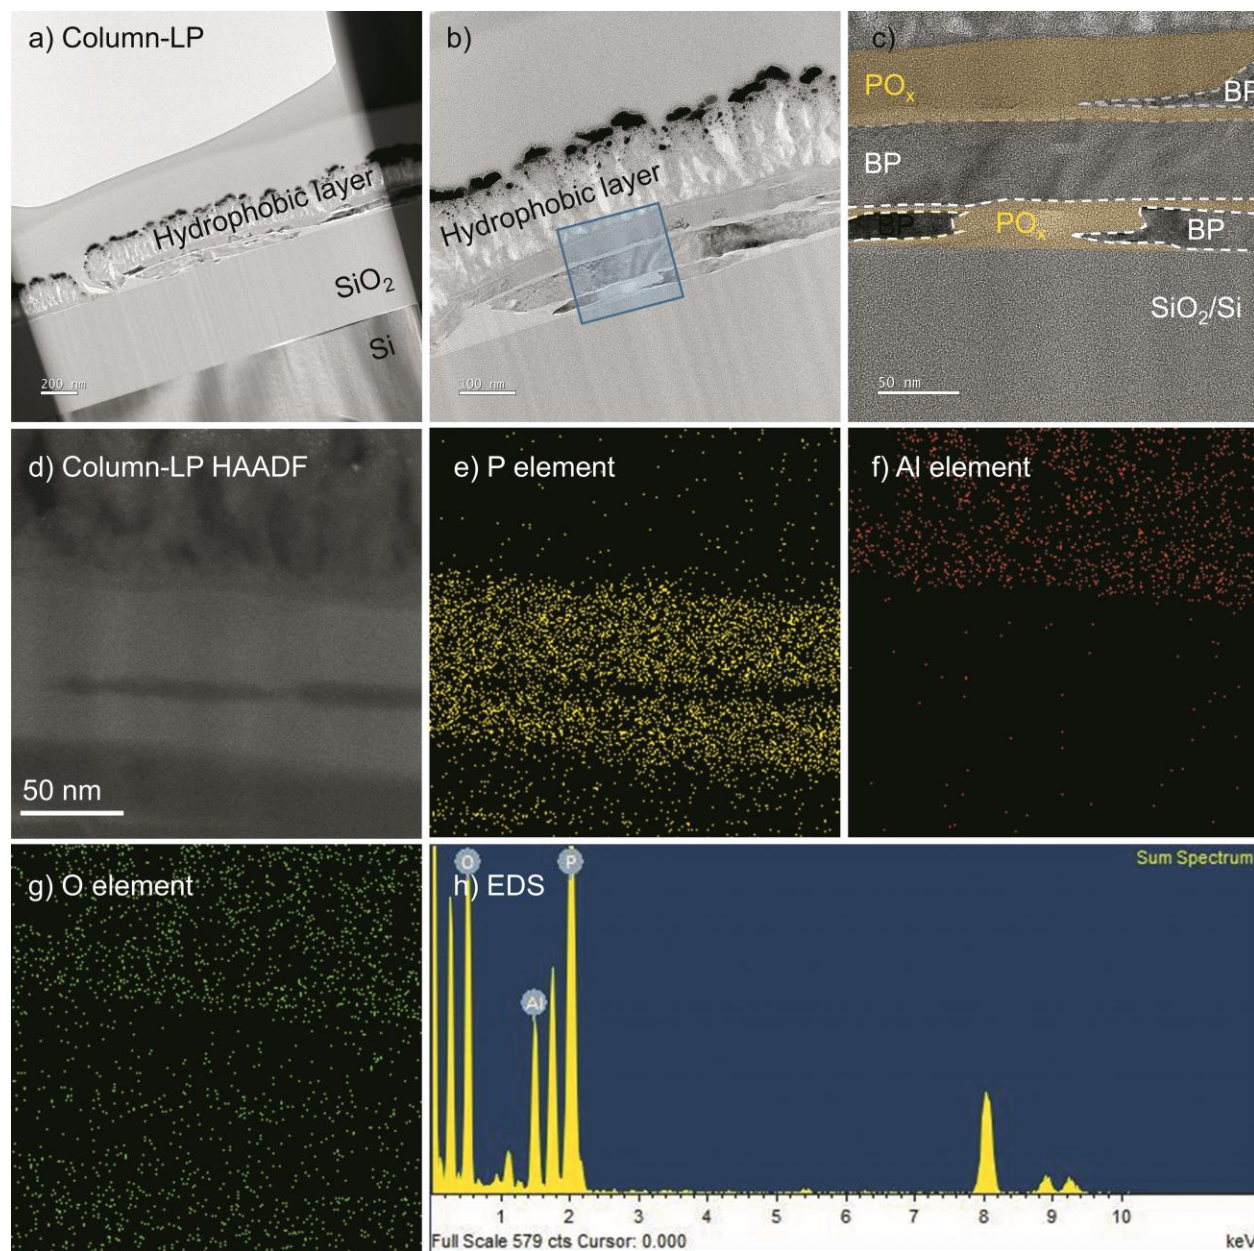

**Figure S6.** Cross-sectional TEM images are taken from the BP flakes assemblies capped with (a-b) the hydrophobic layer (from Column-LP), (c) enlarged image from (b), and the image shows the PO<sub>x</sub>-BP-PO<sub>x</sub> sandwich structure. (d) HAADF STEM image, the corresponding (e-g) EDS-STEM mappings of P, Al, and O elements, and (h) EDS spectrum of (d).

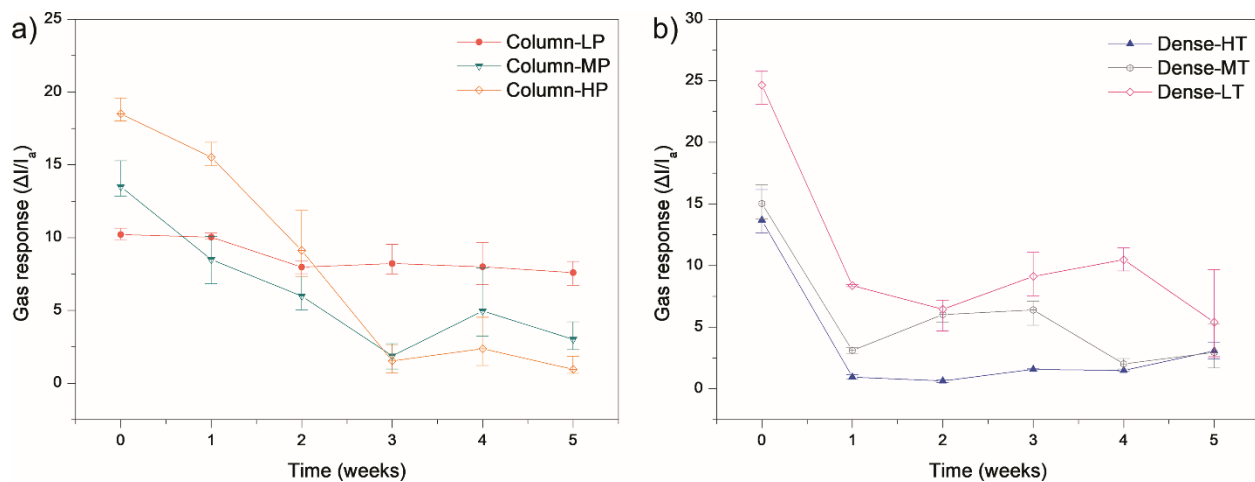

**Figure S7.** The stored-time dependent saturated response ( $\Delta I_{\max}/I_a$  collected from the humidity sensing curves measured at the setting stored time) of the BP flakes assemblies capped with (a) the columnar  $Al_2O_3$  layers and (b) the dense ones.



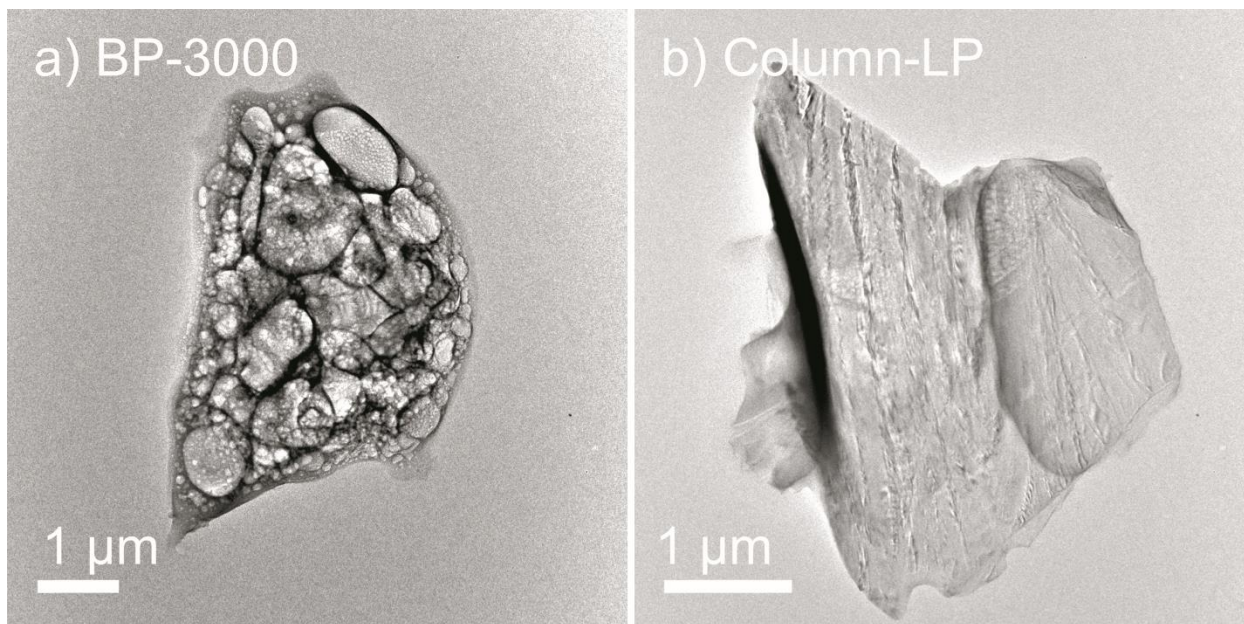

**Figure S8.** The TEM images of (a) an isolated bare BP flake and (b) a separated columnar  $\text{Al}_2\text{O}_3$  layer capped BP flake after being exposed to the atmosphere (RH = 70%) at room temperature for 35 days. The numerous circular patterns were the sign indicating the degradation, more precisely, the formation of phosphoric acids on the BP surface while exposing to a humid atmosphere. In contrast, the relatively smooth surface found from the columnar  $\text{Al}_2\text{O}_3$  capped BP flake reveals the success of the proposed can-sealing concept using hydrophobic  $\text{Al}_2\text{O}_3$  nanostructures as the passivation layers for preventing the rapid degradation of BP.

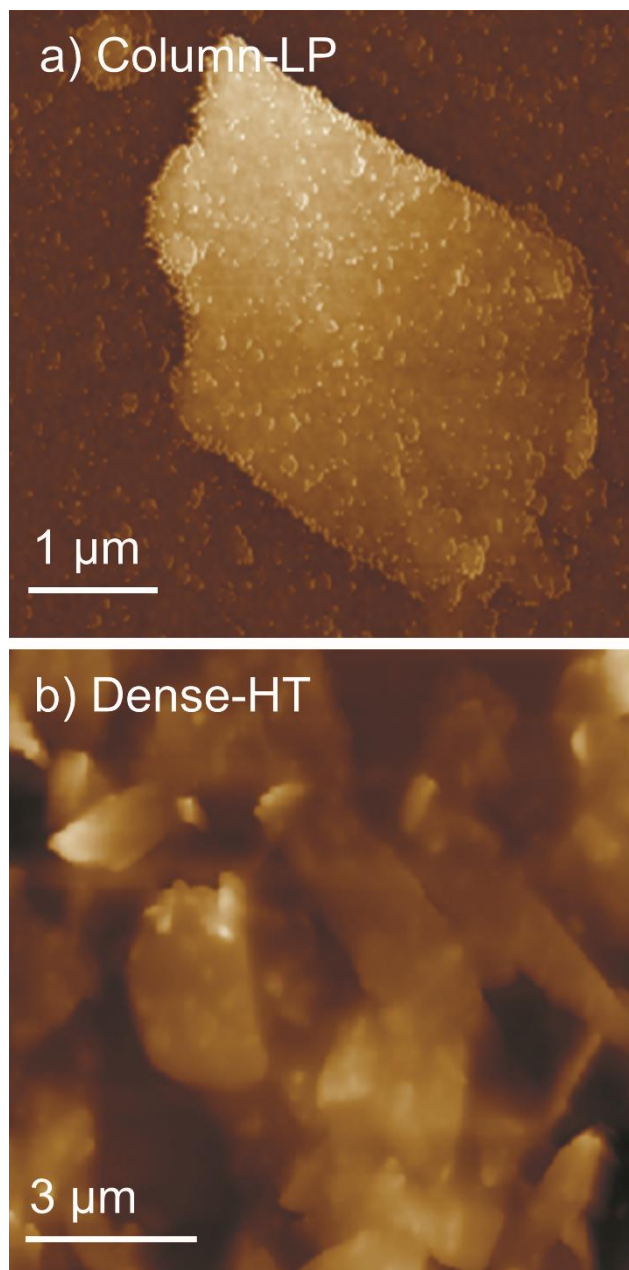

**Figure S9.** The AFM images of (a) an isolated columnar  $\text{Al}_2\text{O}_3$  layer capped BP flake and (b) bare BP flake after being exposed to the atmosphere (RH = 70%) at room temperature for 35 days.
